# Supplementary material
Source: HighWire-hosted journal article supplement (https://gut.bmj.com/content/70/8/1469)
Supplement: inline-supplementary-material-1 [file inline-supplementary-material-1.pdf]

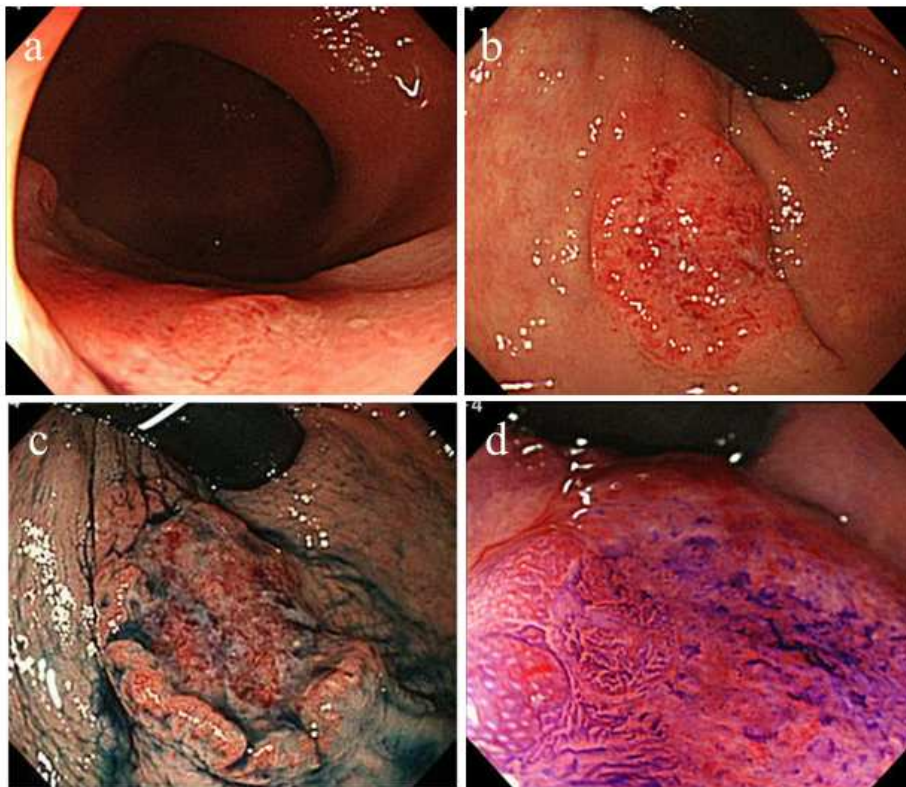

Supplementary figure 1. Metachronous advanced neoplasia identified as invasive cancer [T2N0M0 (Duke's stage B1), location: lower rectum (Rb), size: 20 mm]  
a: Forward view, b: Retroflexed view (conventional white-light), c: Chromoendoscopy (indigo carmine dye), d: Magnifying chromoendoscopy (crystal violet staining)
