# Supplementary material
Source: HighWire-hosted journal article supplement (https://gut.bmj.com/content/70/8/1469)
Supplement: inline-supplementary-material-2 [file inline-supplementary-material-2.pdf]

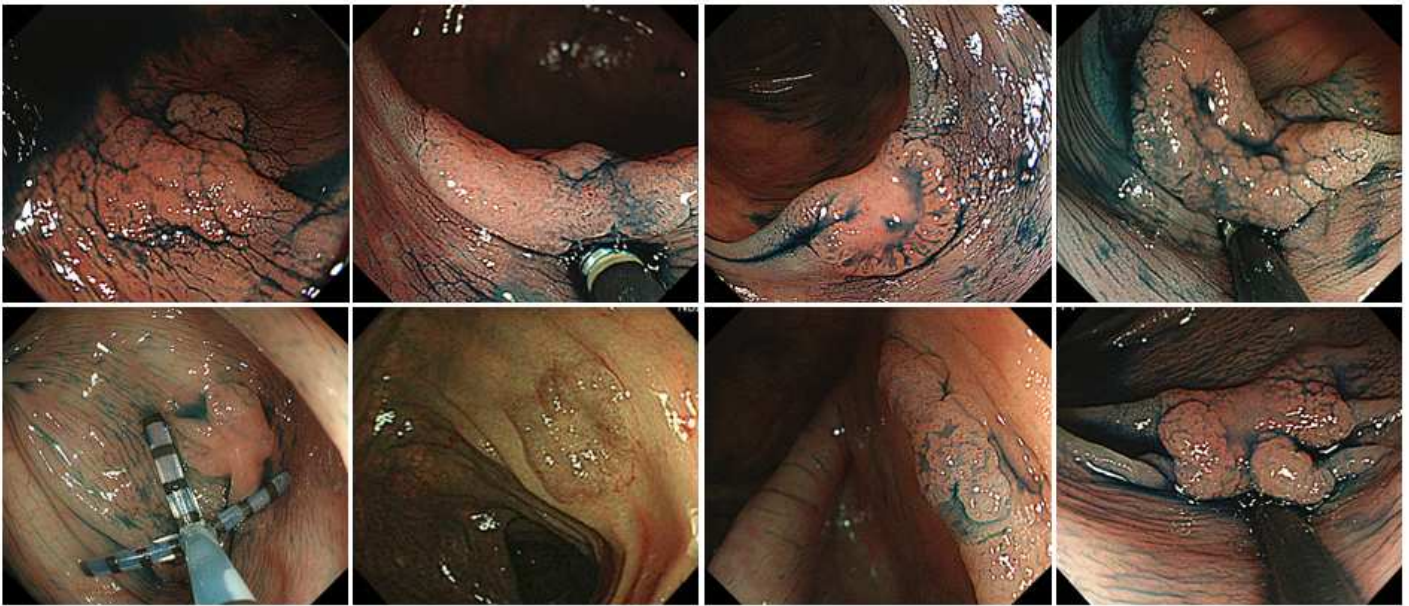

Supplementary figure 2. Representative LST-NG (laterally spreading tumour, non-granular type) metachronous advanced neoplasia
